# Supplementary material for: A new Cu(ii) complex derived from the reaction between tris(2-aminoethyl)amine and Cu(i)-activated acetonitrile with potent anticancer activity against some cell lines and high affinity for the essential proteins of SARS-CoV-2
Source: Royal Society of Chemistry journal article supplement (doi:10.1039/d3nj04142e), 2024-01-01
Supplement: d3nj04142e1.pdf [file d3nj04142e1.pdf]

## ***Electronic supplementary information for:***

### ***A new Cu(II) complex derived from the reaction between tris(2-aminoethyl)amine, and Cu(I)-activated acetonitrile; Potent anticancer activity against some cell lines and high affinity for the essential proteins of SARS-CoV-2***

Farshid Hajibabaei<sup>a</sup>, Sadegh Salehzadeh<sup>a\*</sup>, Katayoun Derakhshandeh<sup>b, c\*</sup>, Robert William Gable<sup>d</sup>

<sup>a</sup> Faculty of Chemistry and Petroleum of Sciences, Bu-Ali Sina University, Hamedan, Iran

<sup>b</sup> Department of Pharmaceutics, School of Pharmacy, Hamadan University of Medical Sciences, Hamadan, Iran

<sup>c</sup> Medicinal Plants and Natural Products Research Center, Hamadan University of Medical Sciences, Hamadan, Iran

<sup>d</sup> School of Chemistry, University of Melbourne, Victoria 3010, Australia

\*Corresponding authors. E-mail addresses: saleh@basu.ac.ir (S. Salehzadeh), [k.derakhshandeh@umsha.ac.ir](mailto:k.derakhshandeh@umsha.ac.ir)

#### ***Contains:***

**Table S1.** Crystal data and structure refinement for CuL, CCDC: 2223417.....2

**Table S2.** Selected bond Angles (°) and bond Lengths (Å) of CuL.....2

**Figure S1.** Molecular docking 2D (a) and 3D (b) models of CuL–M<sup>pro</sup> interaction (PDB ID: 7C8U) which show the binding sites of the CuL with selected amino acids residues of M<sup>pro</sup>.....3

**Figure S2.** Molecular docking 2D (a) and 3D (b) models of CuL–M<sup>pro</sup> interaction (PDB ID: 6LU7) which show the binding sites of the CuL with selected amino acids residues of M<sup>pro</sup>.....3

**Table S1.** Crystal data and structure refinement for CuL, CCDC: 2223417

|                                             |                                                                   |
|---------------------------------------------|-------------------------------------------------------------------|
| Empirical formula                           | C <sub>13</sub> H <sub>28</sub> ClCuN <sub>7</sub> O <sub>3</sub> |
| Formula weight                              | 429.41                                                            |
| Temperature/K                               | 100(1)                                                            |
| Crystal system                              | triclinic                                                         |
| Space group                                 | P-1                                                               |
| a/Å                                         | 8.3648(4)                                                         |
| b/Å                                         | 11.0439(6)                                                        |
| c/Å                                         | 11.5384(8)                                                        |
| α/°                                         | 107.679(6)                                                        |
| β/°                                         | 103.872(5)                                                        |
| γ/°                                         | 106.779(5)                                                        |
| Volume/Å <sup>3</sup>                       | 907.55(10)                                                        |
| Z                                           | 2                                                                 |
| ρ <sub>calc</sub> /g/cm <sup>3</sup>        | 1.571                                                             |
| μ/mm <sup>-1</sup>                          | 1.379                                                             |
| F(000)                                      | 450.0                                                             |
| Crystal size/mm <sup>3</sup>                | 0.335 × 0.226 × 0.038                                             |
| Radiation                                   | Mo Kα (λ = 0.71073)                                               |
| 2θ range for data collection/°              | 5.43 to 59.674                                                    |
| Index ranges                                | -11 ≤ h ≤ 11, -15 ≤ k ≤ 11, -11 ≤ l ≤ 15                          |
| Reflections collected                       | 7277                                                              |
| Independent reflections                     | 4481 [Rint = 0.0202, Rsigma = 0.0365]                             |
| Data/restraints/parameters                  | 4481/0/233                                                        |
| Goodness-of-fit on F <sup>2</sup>           | 1.048                                                             |
| Final R indexes [I ≥ 2σ (I)]                | R1 = 0.0317, wR2 = 0.0798                                         |
| Final R indexes [all data]                  | R1 = 0.0362, wR2 = 0.0826                                         |
| Largest diff. peak/hole / e Å <sup>-3</sup> | 0.56/-0.50                                                        |

**Table S2.** Selected bond Angles (°) and bond Lengths (Å) of CuL

| Bond angles |           | Bond lengths |            |
|-------------|-----------|--------------|------------|
| O1—Cu1—N1   | 172.05(6) | Cu1—O1       | 1.9525(14) |
| O1—Cu1—N2   | 89.69(6)  | Cu1—N1       | 2.0205(16) |
| O1—Cu1—N3   | 98.00(6)  | Cu1—N2       | 1.9609(17) |
| O1—Cu1—N4   | 103.89(6) | Cu1—N3       | 2.0033(17) |
| N1—Cu1—N4   | 83.44(6)  | Cu1—N4       | 2.2605(17) |
| N2—Cu1—N1   | 85.54(7)  |              |            |
| N2—Cu1—N3   | 161.17(7) |              |            |
| N2—Cu1—N4   | 103.75(7) |              |            |
| N3—Cu1—N1   | 84.75(7)  |              |            |
| N3—Cu1—N4   | 91.11(7)  |              |            |

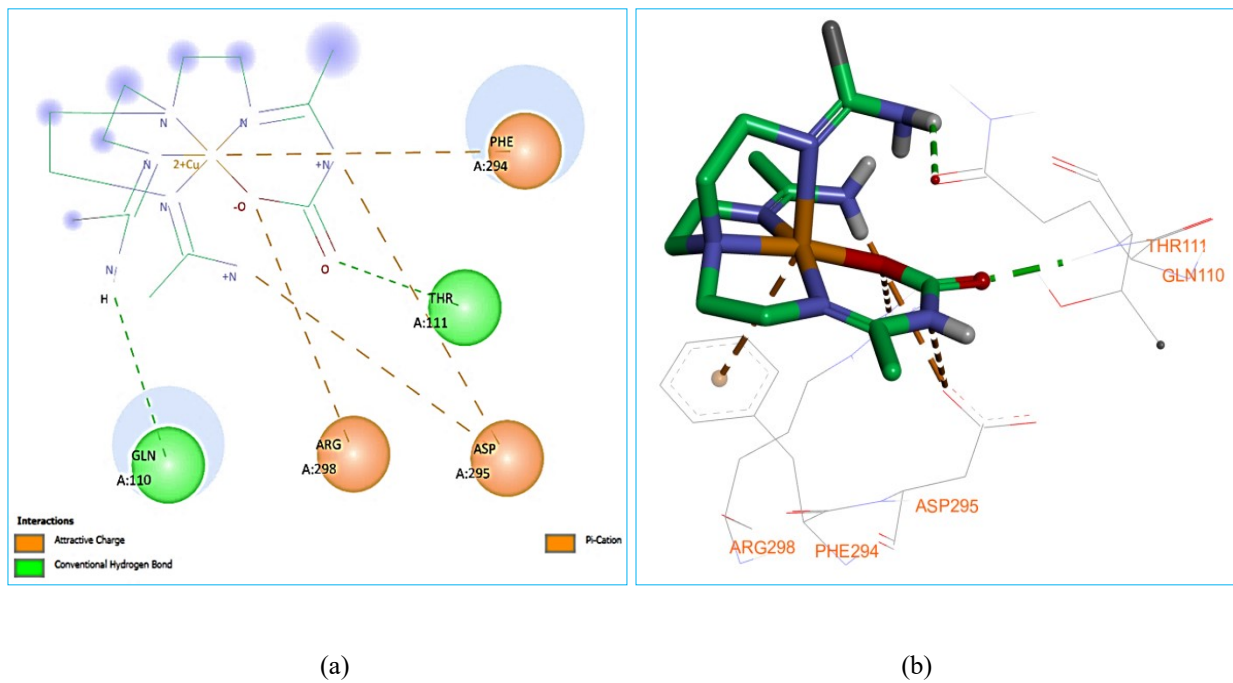

**Fig. S1.** Molecular docking 2D (a) and 3D (b) models of CuL–M<sup>pro</sup> interaction (PDB ID: 7C8U) which show the binding sites of the CuL with selected amino acids residues of M<sup>pro</sup>.

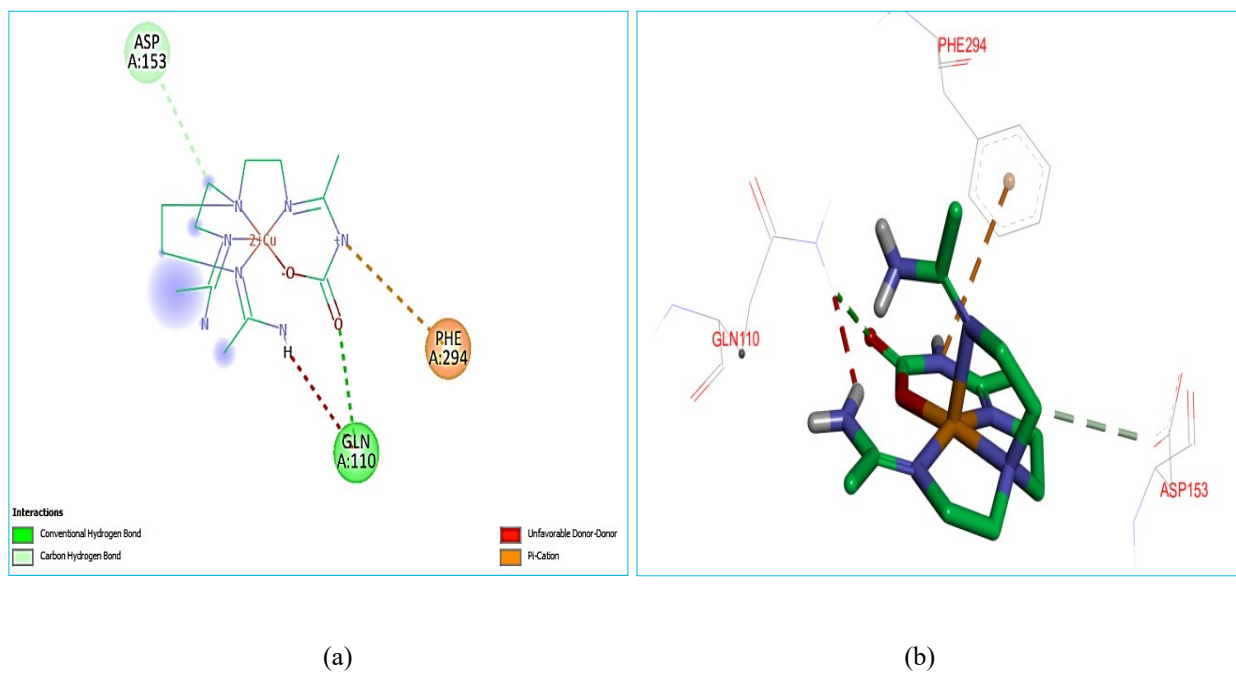

**Fig. S2.** Molecular docking 2D (a) and 3D (b) models of CuL–M<sup>pro</sup> interaction (PDB ID: 6LU7) which show the binding sites of the CuL with selected amino acids residues of M<sup>pro</sup>.
